# Supplementary material for: Clinical Decision-Making for Heart Failure in Kosovo: A Conjoint Analysis
Source: MDPI journal article supplement (doi:10.3390/ijerph192214638), 2022-11-08
Supplement: s1 [file s1]

**Table S1. Example case from the first experiment.**

> 70 years old  
Smoker  
No family history with cardiovascular problems  
No comorbidities  
BMI 25 - 30 (over-weight)  
No dyspnoea  
Reduced tolerance to physical activity  
Persistent coughing or wheezing  
No signs of appetite loss or nausea  
Confused  
No oedema  
Increased heart rate  
Orthopnoea  
Unusual fatigue  
Visible jugular veins in the neck area

☐Yes      ☐No

**Table S2. Example case from second experiment.**

Normal jugular venous pressure  
Hepato-jugular reflux  
No pleural effusion  
Displaced point of maximal impulse  
Third heart sound can be heard  
No heart murmur  
Lung insufficiency  
CPR 3 - 10 mg/L  
Troponin > 0.4 ng/mL (high)  
Creatinine kinase - MB 5 - 25 UI/L  
LDH 140 - 280 UI/L  
BNP < 100 pg/mL  
NTproBNP > 400 pg/mL

☐Yes      ☐No
